# Supplementary material
Source: HighWire-hosted journal article supplement (https://erj.ersjournals.com/content/57/2/2002737)
Supplement: inline-supplementary-material-1 [file inline-supplementary-material-1.pdf]

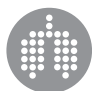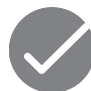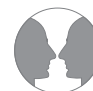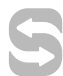

SHAREABLE PDF

# mTORC1 hyperactivation in lymphangioleiomyomatosis leads to *ACE2* upregulation in type II pneumocytes: implications for COVID-19

Yan Tang<sup>1</sup>, David J. Kwiatkowski<sup>1,2</sup> and Elizabeth P. Henske<sup>1,2</sup>

**Affiliations:** <sup>1</sup>Division of Pulmonary and Critical Care Medicine, Brigham and Women's Hospital and Harvard Medical School, Boston, MA, USA. <sup>2</sup>D.J. Kwiatkowski and E.P. Henske contributed equally to this article as lead authors and supervised the work.

**Correspondence:** Elizabeth P. Henske, 20 Shattuck Street, Division of Pulmonary Medicine and Critical Care Medicine, Brigham and Women's Hospital, Harvard Medical School, Boston, MA 02115, USA. E-mail: ehenske@bwh.harvard.edu

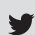

@ERSpublications

Increased pneumocyte expression of the SARS-CoV-2 entry receptor *ACE2* in lymphangioleiomyomatosis (LAM) is associated with upregulation of interferon pathways in natural killer cells as well as increased *IL6* expression in LAM-associated fibroblasts <https://bit.ly/34ChSsg>

**Cite this article as:** Tang Y, Kwiatkowski DJ, Henske EP. mTORC1 hyperactivation in lymphangioleiomyomatosis leads to *ACE2* upregulation in type II pneumocytes: implications for COVID-19. *Eur Respir J* 2021; 57: 2002737 [<https://doi.org/10.1183/13993003.02737-2020>].

This single-page version can be shared freely online.

## *To the Editor:*

Respiratory failure is among the gravest outcomes of coronavirus disease 2019 (COVID-19), and most of the severe cases are associated with significant lung comorbidities [1]. Lymphangioleiomyomatosis (LAM) is a progressive cystic lung disease of women caused by mutations in tuberous sclerosis genes, resulting in aberrant hyperactivation of the mTOR complex 1 (mTORC1) signalling network in LAM cells, which are of mesenchymal origin [2]. The risk of COVID-19 in LAM is unknown.
